# Supplementary material for: Land Cover Patterns of Urban Lots and Their Contribution to Ecological Functions
Source: MDPI journal article supplement (doi:10.3390/su16073063), 2024-04-07
Supplement: s1 [file s1]

## Supplementary Material

Table S1: Land cover and use types definitions

| Land Cover and Use Types                           | Definition                                                                                        |
|----------------------------------------------------|---------------------------------------------------------------------------------------------------|
| Agriculture                                        | Areas of agricultural cultivation, especially vegetable gardens                                   |
| Bare Soil                                          | Soil without plant cover                                                                          |
| Forest Advanced-Intermediate Stage of Regeneration | Forests in more advanced or middle stages of regeneration with taller or more developed trees     |
| Forest Initial Stage of Regeneration               | Younger forests in the early stages of regeneration with smaller trees and development            |
| Herbaceous-shrubby vegetation                      | Vegetation with predominance of grasses and/or shrubs, including lawns and spontaneous vegetation |
| Impermeable Surfaces                               | Surfaces composed by asphalt, cement and/or constructions resistant to water penetration          |
| Pasture                                            | Grasslands interrupted by sparse trees                                                            |
| Savanna                                            | Vegetation composed of spaced trees, shrubs and native grasses                                    |
| Tree Clumps                                        | Groupings of trees of various species, including native and exotic (such as a tree yard)          |
| Water                                              | Small ponds or pools                                                                              |
| Commercial Industrial                              | Industrial units and support infrastructure                                                       |
| Commercial Institutional                           | Areas composed of schools, clubs, sports courts, squares, power lines, airports                   |
| Commercial Parking                                 | Parking places with presence of several vehicles                                                  |
| Commercial Sheds                                   | Sheds for various purposes, including warehouses                                                  |
| Commercial Sheds Parking                           | Sheds associated with parking areas                                                               |
| Housing Building                                   | Residences composed of buildings                                                                  |
| Housing Courtyard                                  | Patios and yards covered by asphalt, cement or exposed soil                                       |
| Housing House                                      | Residences composed of houses                                                                     |
| Pavement Asphalt                                   | Surfaces covered by asphalt of unknown use                                                        |

Table S2: Average weight given by experts for the ecological functions of the various land cover that comprised: A (habitat provisioning); B (biodiversity conservation); C (water infiltration and storage); D (microclimate regulation); E (air purification and filtration); F (carbon sequestration and storage); G (soil conservation). Values ranged from 0 to 4 meaning: 0 (no importance or contribution to the ecological function considered); 1 (low importance or contribution to the ecological function considered); 2 (medium importance or contribution to the ecological function considered); 3 (high importance or contribution to the ecological function considered); 4 (very high importance or contribution to the ecological function considered).

| Land Cover                         | A | B | C | D | E | F | G |
|------------------------------------|---|---|---|---|---|---|---|
| Forest Advanced-Intermediate Stage | 4 | 4 | 4 | 4 | 4 | 4 | 4 |
| Forest Initial Stage               | 3 | 3 | 4 | 4 | 3 | 3 | 4 |
| Savanna                            | 3 | 3 | 3 | 3 | 3 | 3 | 3 |
| Tree Clumps                        | 3 | 3 | 3 | 3 | 3 | 3 | 3 |
| Herbaceous-Shrubby Vegetation      | 2 | 2 | 3 | 2 | 2 | 2 | 3 |
| Pasture                            | 2 | 2 | 2 | 2 | 2 | 2 | 2 |
| Agriculture                        | 2 | 2 | 2 | 2 | 2 | 2 | 2 |
| Bare Soil                          | 1 | 1 | 1 | 0 | 0 | 1 | 1 |
| Water                              | 1 | 1 | 2 | 2 | 1 | 1 | 1 |
| Impermeable Surfaces               | 0 | 0 | 0 | 0 | 0 | 0 | 0 |

Table S3: Minimum, median, and maximum lots size by each class of vegetation quality and administrative unit (N=2,828)

| Vegetation Quality and Administrative Units | Minimum Size (m2) | Median Size (m2) | Maximum Size (m2) |
|---------------------------------------------|-------------------|------------------|-------------------|
| Low Vegetation Quality                      | 37                | 510              | 92,323            |
| Moderate Vegetation Quality                 | 36                | 409              | 383,375           |
| High Vegetation Quality                     | 98                | 403              | 246,634           |
| Very High Vegetation Quality                | 64                | 374              | 8,874             |
| No Vegetation Permeable                     | 36                | 366              | 34,280            |
| No Vegetation Impermeable                   | 36                | 373              | 9,517             |
| Barreiro                                    | 68                | 380              | 383,375           |
| East                                        | 36                | 413              | 89,422            |
| North                                       | 129               | 374              | 246,634           |
| Northeast                                   | 36                | 331              | 158,748           |
| Northwest                                   | 36                | 456              | 74,682            |
| Pampulha                                    | 36                | 403              | 20,807            |
| South Center                                | 150               | 443              | 32,411            |
| West                                        | 37                | 473              | 92,323            |
| Venda Nova                                  | 54                | 367              | 46,335            |

Table S4: Distribution of vegetation quality classes between used and unused, public and private lots

| Vegetation Quality Classes   | Used Public | Used Private | Unused Public | Unused Private | Total Public | Total Private | Overall Total |
|------------------------------|-------------|--------------|---------------|----------------|--------------|---------------|---------------|
| Low Vegetation Quality       | 55          | 404          | 10            | 177            | 65           | 581           | 646           |
| Moderate Vegetation Quality  | 11          | 156          | 36            | 821            | 47           | 977           | 1024          |
| High Vegetation Quality      | 1           | 33           | 3             | 91             | 4            | 124           | 128           |
| Very High Vegetation Quality | 0           | 6            | 8             | 102            | 8            | 108           | 116           |
| No Vegetation Permeable      | 10          | 99           | 11            | 199            | 21           | 298           | 319           |
| No Vegetation Impermeable    | 36          | 559          | 0             | 0              | 36           | 559           | 595           |

Table S5: Descriptive statistics of the land cover clusters

| Clusters           | Tree Clumps | Herbaceous-Shrubby Vegetation | Forest Advanced-Intermediate Stage | Forest Initial Stage | Savanna | Pasture | Agriculture | Water | Bare Soil | Impermeable Surfaces |
|--------------------|-------------|-------------------------------|------------------------------------|----------------------|---------|---------|-------------|-------|-----------|----------------------|
| 1                  | 4.08        | 3.95                          | 0.22                               | 0.13                 | 0.10    | 0.00    | 0.00        | 0.21  | 2.42      | 88.88                |
| Mean               |             |                               |                                    |                      |         |         |             |       |           |                      |
| Median             | 0.00        | 0.00                          | 0.00                               | 0.00                 | 0.00    | 0.00    | 0.00        | 0.00  | 0.00      | 100.00               |
| Range              | 40.00       | 45.00                         | 50.00                              | 40.00                | 50.00   | 0.00    | 0.00        | 55.00 | 45.00     | 60.00                |
| Standard Deviation | 8.47        | 9.23                          | 2.99                               | 1.90                 | 2.00    | 0.00    | 0.00        | 2.13  | 7.46      | 15.71                |
| % of total Sum     | 14.70       | 4.90                          | 7.40                               | 4.00                 | 14.20   | 0.00    | 0.00        | 69.30 | 4.80      | 92.20                |
| 2                  | 4.19        | 4.65                          | 0.00                               | 0.16                 | 0.00    | 0.02    | 0.00        | 0.00  | 85.88     | 5.10                 |
| Mean               |             |                               |                                    |                      |         |         |             |       |           |                      |
| Median             | 0.00        | 0.00                          | 0.00                               | 0.00                 | 0.00    | 0.00    | 0.00        | 0.00  | 95.00     | 0.00                 |
| Range              | 40.00       | 45.00                         | 0.00                               | 40.00                | 0.00    | 10.00   | 0.00        | 0.00  | 60.00     | 50.00                |
| Standard Deviation | 8.80        | 10.19                         | 0.00                               | 2.17                 | 0.00    | 0.46    | 0.00        | 0.00  | 16.51     | 12.28                |
| % of total Sum     | 6.60        | 2.50                          | 0.00                               | 2.10                 | 0.00    | 3.20    | 0.00        | 0.00  | 74.30     | 2.30                 |

[illegible]
